# Supplementary material for: Remarkably high thermal-driven MoS2 grain boundary migration mobility and its implications on defect healing
Source: Royal Society of Chemistry journal article supplement (doi:10.1039/d0nr03871g), 2020-01-01
Supplement: d0nr03871g4.pdf [file d0nr03871g4.pdf]

## Supporting information

### Remarkably high thermal-driven MoS<sub>2</sub> grain boundary migration mobility and its implications on defect healing

Xiangjun Liu<sup>1,\*</sup>, Zhi Gen Yu<sup>2</sup>, Gang Zhang<sup>2</sup>, Yong-Wei Zhang<sup>2</sup>

<sup>1</sup>Institute of Micro/Nano Electromechanical System, College of Mechanical Engineering,  
Donghua University, Shanghai, China.

<sup>2</sup>Institute of High Performance Computing, A\*STAR, Singapore

S1. Movie showing the evolution of the MoS<sub>2</sub> film with S4|6 and S6|8 GBs at a temperature of  $T = 800$  K.

S2. Movie showing the evolution of the MoS<sub>2</sub> film with multiple S4|6 and S6|8 GBs upon thermal equilibration at a temperature of  $T = 1000$  K.

S3. Movie showing the evolution of the MoS<sub>2</sub> film with S4|6, Mo5|7 and S6|8 GBs upon thermal equilibration at a temperature of  $T = 1000$  K.

S4. Mobility of Mo5|7, S4|6 and S6|8 GBs.

S4. Mobility of Mo5|7, S4|6 and S6|8 GBs

---

\* Corresponding author. Email: xjliu@dhu.edu.cn

The mobility of Mo5|7 GB has also been explored. A film with Mo5|7, S4|6 and S6|8 GBs was simulated under annealing temperature  $T=1000$  K. The snapshots of GB migration process are displayed in Figure S1 and the full migration process is presented in the Supporting Information Video 3.

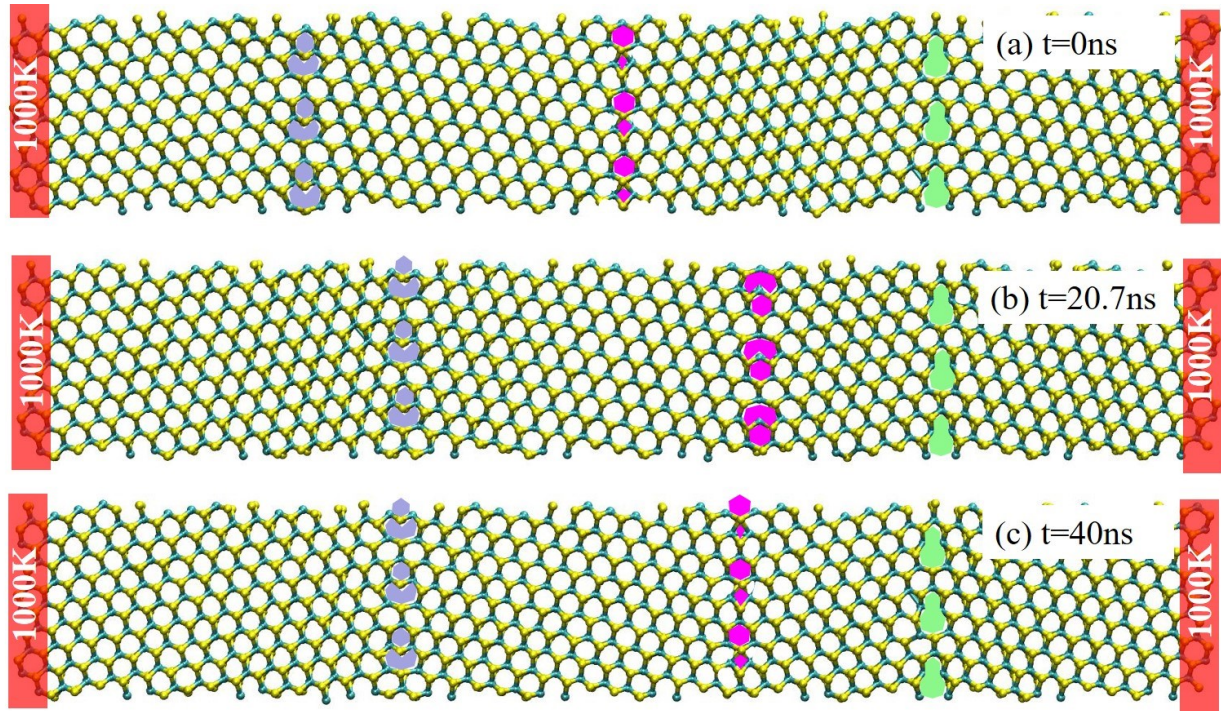

Figure S1. Snapshots of the migration of S4|6, S6|8 and Mo5|7 GBs in the MoS<sub>2</sub> film upon thermal equilibration at a temperature of  $T = 1000$  K.
